# Supplementary material
Source: PubMed Central journal article supplement (PMC3129236)
Supplement: supp_ntr032_Dual_Use_Supplemental_Materials_Appendix-A.pdf [file supp_ntr032_Dual_Use_Supplemental_Materials_Appendix-A.pdf]

## Supplemental Materials: Appendix A

The prevalence of dual tobacco use and its definition across two dimensions, tobacco products used and frequency of use.

| Study/year/Country        | Population                             | Survey                                                                                                                | Prevalence % | Definition/<br>Terminology | Definition of Dual Tobacco Use across Two Dimensions |                                                                                                                                                                   |
|---------------------------|----------------------------------------|-----------------------------------------------------------------------------------------------------------------------|--------------|----------------------------|------------------------------------------------------|-------------------------------------------------------------------------------------------------------------------------------------------------------------------|
|                           |                                        |                                                                                                                       |              |                            | Substance                                            | Frequency of dual use                                                                                                                                             |
| *Skander/1989/<br>Algeria | Adult males<br>≥ 18 years<br>old       | Representative sample of men<br>and women in Algeria                                                                  | 13.4         | Use both                   | Cig + ST                                             | Current use of Cig and ST                                                                                                                                         |
| Lando/1999/US             | Adults                                 | Population of Air Force Basic<br>Military Training (BMT) recruits                                                     | 1.28         | Poly use                   | Cig + ST                                             | Current use of Cig and ST up to basic military training<br>(BMT)                                                                                                  |
| *Spangler/1999/US         | Adults<br>≥ 18 years<br>old            | Telephone survey among Lumbee<br>Indians in North Carolina                                                            | 17.3         | Dual use                   | Cig + ST                                             | Ever use of Cig and ST                                                                                                                                            |
| Horn/2000/US              | Adolescents<br>9 <sup>th</sup> graders | The Year 2000 Youth Tobacco<br>Assessment (Y2YTA) in rural<br>West Virginia                                           | 10           | Conjoint use               | Cig + ST                                             | <u>Current Cig use:</u> occasionally <sup>a</sup> or everyday<br><u>Current ST use:</u> occasionally <sup>a</sup> or everyday                                     |
| Spangler/2001/US          | Adults (Native<br>American)            | Telephone survey among Lumbee<br>Indians in North Carolina                                                            | 4.8          | Dual use                   | Cig + ST                                             | <u>Current Cig use:</u> ever smoke <sup>b</sup> + now<br><u>Current ST use:</u> used ST in past 30 days + now                                                     |
| Tomar/2002/US             | Adult males<br>≥ 18 years<br>old       | The National Health Interview<br>Survey                                                                               | 1.1          | Concurrent use             | Cig + ST                                             | <u>Current Cig use:</u> ever smoke <sup>b</sup> + smoke every day or<br>some days<br><u>Current ST use:</u> ever use <sup>c</sup> + use every day or some<br>days |
| Wetter/2002/US            | Adult males<br>≥ 18 years<br>old       | Employed adults residing in the<br>southeastern US who participated<br>in the Working Well Cancer<br>Prevention trial | 4            | Concomitant use            | Cig + ST                                             | <u>Current Cig use:</u> ever smoke <sup>b</sup> + smoke in past 7 days<br><u>Current ST use:</u> (no more details)                                                |

|                  |                                           |                                                                               |                                                                                                      |                |          |                                                                                                                                                      |
|------------------|-------------------------------------------|-------------------------------------------------------------------------------|------------------------------------------------------------------------------------------------------|----------------|----------|------------------------------------------------------------------------------------------------------------------------------------------------------|
| Rodu/2002/SW     | Adults<br>25-64 years old                 | The Northern Sweden MONICA Study                                              | 1986: 4/0 <sup>d</sup><br>1990: 5/1 <sup>d</sup><br>1994: 4/1 <sup>d</sup><br>1999: 3/1 <sup>d</sup> | Combined use   | Cig + ST | <u>Daily Cig use</u> : at least one cigarette per day<br><u>Daily ST use</u> : use any amount each day                                               |
| Wickholm/2003/SW | Adolescent males<br>9 <sup>th</sup> grade | A census survey in the Stockholm region                                       | 13.8                                                                                                 | Combined user  | Cig + ST | <u>Current use of Cig and ST</u> : Daily/almost daily/only on weekend or parties                                                                     |
| Post/2005/SW     | Adolescents<br>11-18 years old            | The BROMS (Children's Smoking and Environment in the Stockholm County) Study  | 14.2                                                                                                 | Mixed user     | Cig + ST | <u>Current monthly use of Cig and ST</u> : at least once per month                                                                                   |
| Mumford 2005/US  | Adult males<br>≥ 25 years old             | The 1992–2002 Tobacco Use Supplements (CPS-TUS) from 1992–2002                | 1992/93: 1.0<br>2001/02: 0.9                                                                         | Concurrent use | Cig + ST | <u>Current Cig use</u> : ever smoke <sup>b</sup> + smoke every day or some days<br><u>Current ST use</u> : ever use + use in past 30 days            |
| Mumford/2006/US  | Adults<br>≥ 18 years old                  | The 1992–2002 Tobacco Use Supplements (CPS-TUS) from 1992–2002                | 1992/93: 0.49<br>1995/96: 0.45<br>1998: 0.36<br>1999: 0.40<br>2000: 0.32<br>2001/02: 0.28            | Concurrent use | Cig + ST | <u>Current Cig use</u> : ever smoke <sup>b</sup> + smoke every day or some days<br><u>Current ST use</u> : used at least 10 days of the past 30 days |
| Croucher/2007/UK | Adult males<br>≥ 18 years old             | A cross-sectional bilingual interview survey among resident Bangladeshi in UK | 22                                                                                                   | Concurrent use | Cig + ST | Daily use of Cig and ST in last 6 months                                                                                                             |
| Galanti/2008/SW  | Adolescents<br>11-18 years old            | The BROMS (Children's Smoking and Environment in the Stockholm County) Study  | 19.3                                                                                                 | Mixed user     | Cig + ST | Weekly use for at least three months in a row for both Cig and ST                                                                                    |

|                                |                                            |                                                                                            |                                                             |                                   |                    |                                                                                                                                                                                                                                                      |
|--------------------------------|--------------------------------------------|--------------------------------------------------------------------------------------------|-------------------------------------------------------------|-----------------------------------|--------------------|------------------------------------------------------------------------------------------------------------------------------------------------------------------------------------------------------------------------------------------------------|
| Rodu/2009/US                   | Adult males<br>≥ 18 years old              | US National Health Interview Survey from 2000 and 2005                                     | 2000: 1.2<br>2005: 1.4                                      | Dual use                          | Cig + ST           | <u>Current cig use:</u> ever smoke <sup>b</sup> + smoke every day or some days<br><br><u>Current ST use:</u> ever use <sup>c</sup> + use every day or some days                                                                                      |
| Digard/2009/SW                 | Adults<br>≥ 18 years old                   | Telephone surveys of randomly selected numbers in all regions of Sweden in 2007/08.        | 9.8                                                         | Dual use                          | Cig + ST           | Daily ST use + smoke cigarettes daily or occasionally                                                                                                                                                                                                |
| Post /2010/SW                  | Adolescents<br>11-18 years old             | The BROMS (Children's Smoking and Environment in the Stockholm County) Study               | 28.2 <sup>e</sup><br>6.9 <sup>f</sup>                       | Dual use                          | Cig + ST           | <u>Current monthly use of Cig and ST:</u> at least once per month                                                                                                                                                                                    |
| Everett/2000/US                | Adolescents<br>High school student         | 1997 National Youth Risk Behavior Survey, CDC                                              | 19.5                                                        | Use more than one tobacco product | Cig/ST/Cigar       | <u>Current use of more than one tobacco product:</u> use tobacco products in past 30 days (any number other than zero considered current use)                                                                                                        |
| Rigotti/2000/US                | Adult college students<br>18- 24 years old | The Harvard College Alcohol Survey                                                         | 58.2 <sup>e</sup><br>27.5 <sup>f</sup>                      | Combination of tobacco use        | Cig/ST/Cigar/Pipe  | <u>Current use more than one tobacco product :</u> use more than one tobacco product in past year                                                                                                                                                    |
| Chao/2002/US                   | Adult males<br>≥ 18 years old              | Prospective Mortality Study in the USA                                                     | 17                                                          | Use more than one type of tobacco | Cig/ST/Cigar/Pipe  | <u>Current use of more than one tobacco product:</u> use at enrollment                                                                                                                                                                               |
| <sup>g</sup> Backinger/2008/US | Adults<br>≥ 18 years old                   | Tobacco Use Supplements to the Current Population Survey (TUS-CPS), 1995/96/98, 2000/01/02 | 1.21 <sup>h</sup><br>0.89 <sup>j</sup><br>0.32 <sup>k</sup> | Concurrent use                    | Cig/ST/Cigar/Pipe  | <u>Current cig use:</u> ever smoke <sup>b</sup> + smoke every day or some days<br><br><u>Daily cig use:</u> every day<br><br><u>Intermittent cig use:</u> some days<br><br><u>Current use of other tobacco product:</u> use at the time of interview |
| Gilpin/2003/US                 | Adolescents<br>12-17 years                 | The 1999 California Tobacco Survey                                                         | 14.5                                                        | Use more than one tobacco         | Cig/ST/Cigar/Bidis | <u>Current use of more than one tobacco product:</u> smoke or use any tobacco products in the 30 days (any                                                                                                                                           |

|                 | old                                    |                                                                       |                                    | product                                 |                                     | number other than zero considered current use)                                                                                                                              |
|-----------------|----------------------------------------|-----------------------------------------------------------------------|------------------------------------|-----------------------------------------|-------------------------------------|-----------------------------------------------------------------------------------------------------------------------------------------------------------------------------|
| Bombard/2007/US | Adults<br>≥ 18 years<br>old            | Behavioral Risk Factor<br>Surveillance System (BRFSS) in<br>10 states | 3.4                                | Poly tobacco use                        | Cig/ST/Cigar/Pipe/<br>Bidis         | <u>Current Cig use:</u> ever smoke <sup>b</sup> + smoke every day or<br>some days<br><br><u>Current other tobacco product use:</u> ever use + use<br>every day or some days |
| Tercyak/2002/US | Adolescents<br>9 <sup>th</sup> graders | School-based self-report survey                                       | 18 <sup>l</sup><br>13 <sup>m</sup> | Use more than<br>one tobacco<br>product | Cig/ST/Cigar/Pipe/<br>Bidis/Kreteks | <u>Current use of more than one tobacco product:</u> use<br>tobacco products in past 30 days (any number other<br>than zero considered current use)                         |
| Bombard/2008/US | Adolescents<br>Grades 6- 12            | National Youth Tobacco Surveys<br>from 2002/04                        | 6.9                                | Poly tobacco use                        | Cig/ST/Cigar/Pipe/<br>Bidis/Kretek  | <u>Current cig use:</u> smoked during past 30 days<br><br><u>Current other tobacco product use:</u> use during past 30<br>days                                              |

(Cig) Cigarettes; (ST) Smokeless Tobacco; \*Available only by abstract; (US) United State; (SW) Sweden; (UK) United Kingdom.

<sup>a</sup>Everything other than every day; <sup>b</sup>Ever cigarette smoking defined as smoked at least 100 cigs in lifetime; <sup>c</sup>Ever ST use defined as used at least 20 times in lifetime; <sup>d</sup>First value is for males and second value is for females; <sup>e</sup>Among males; <sup>f</sup>Among females; <sup>g</sup>Report 3 values for dual use prevalence according to frequency of cig use; <sup>h</sup>Current cig use + use other tobacco product at the time of interview; <sup>i</sup>Daily cig use + use other tobacco product at the time of interview; <sup>k</sup>Intermittently cig use + use other tobacco product at the time of interview; <sup>l</sup>Use 2 products; <sup>m</sup>Use 3 or more products.
